# Supplementary material
Source: publisher figshare collection journal article supplement (https://asha.figshare.com/ndownloader/files/31509326)

**Supplemental Material S7.** Scatterplot illustrating the correlation between unidimensional item difficulty estimates obtained by Fergadiotis et al. (2015) and the current study.

Scatterplot comparing item difficulty estimates  $\delta_k$  for the binomial probability of a correct response, IRT-P(S), on each item of the Philadelphia Naming Test, obtained by a previous study (Fergadiotis, G., Kellough, S., & Hula, W. D. (2015). Item response theory modeling of the Philadelphia Naming Test. *Journal of Speech, Language, and Hearing Research*, 58(3), 865-877), on the x-axis, and the current study, on the y-axis. The diagonal dotted line represents the identity line.

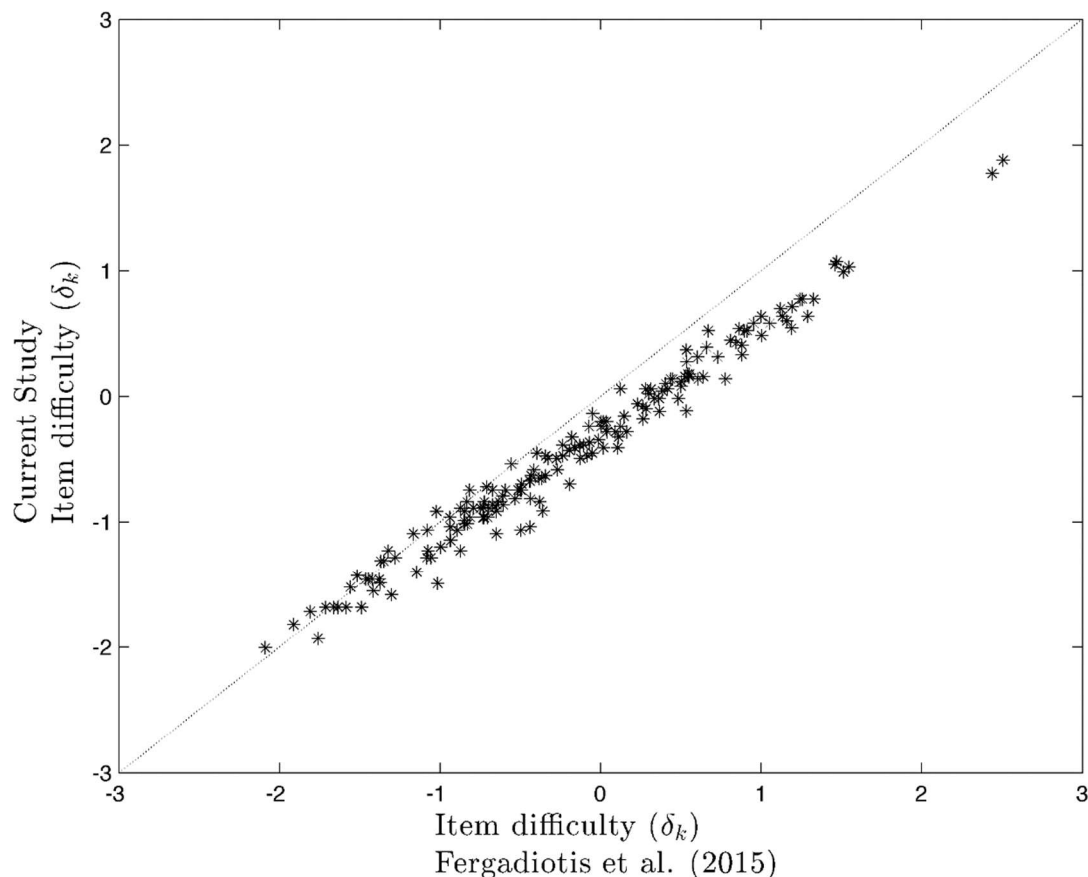

Supplement: Supplementary file 1 [file 31509326]
